# Supplementary material for: Production and characterisation of self-blowing lignin-based foams
Source: Springer Nature journal article supplement (doi:10.1007/s00107-022-01908-1), 2022-12-22
Supplement: MOESM1 [file 23853876]

**Leaching Tests**


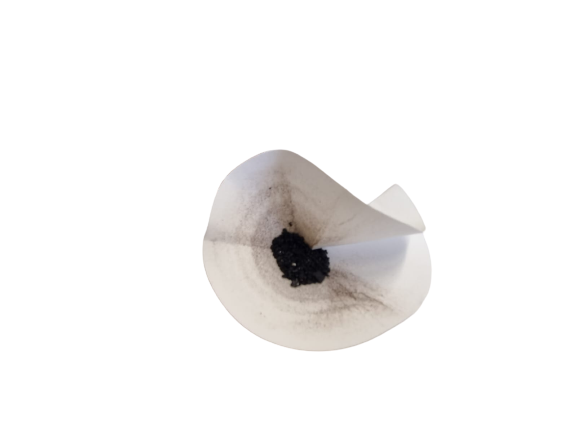

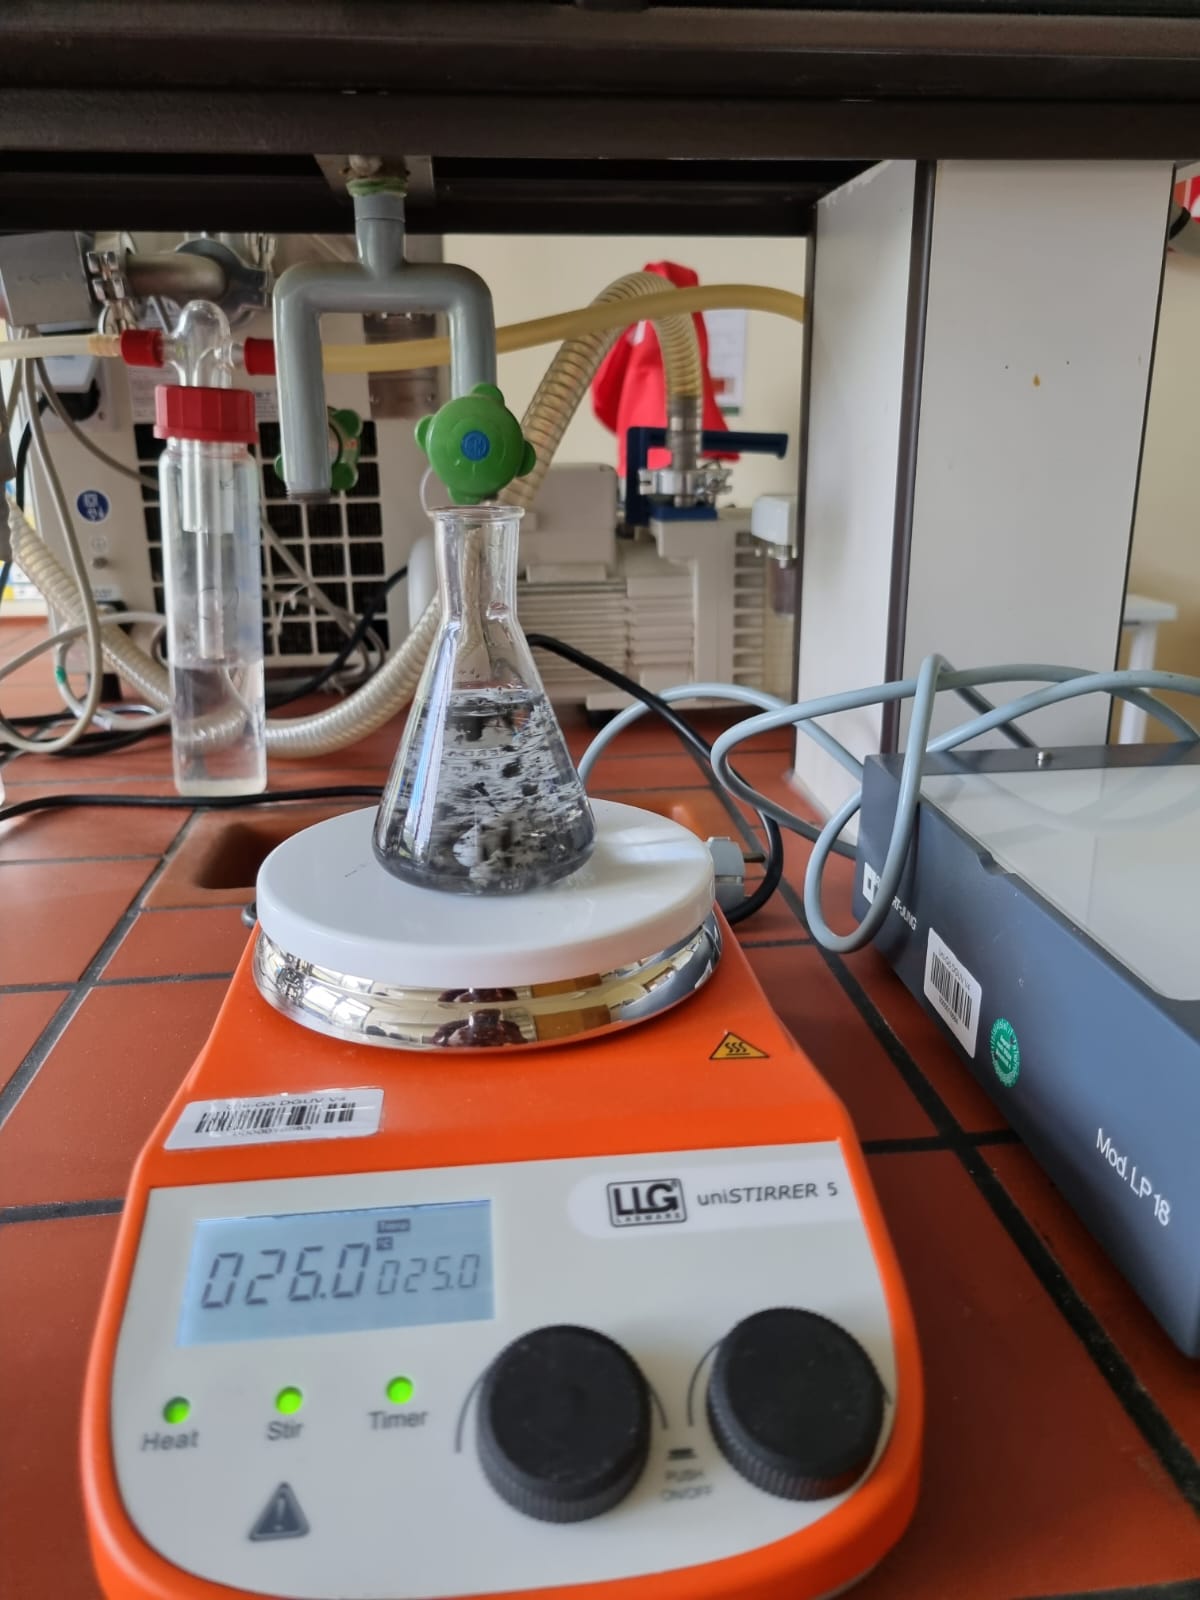


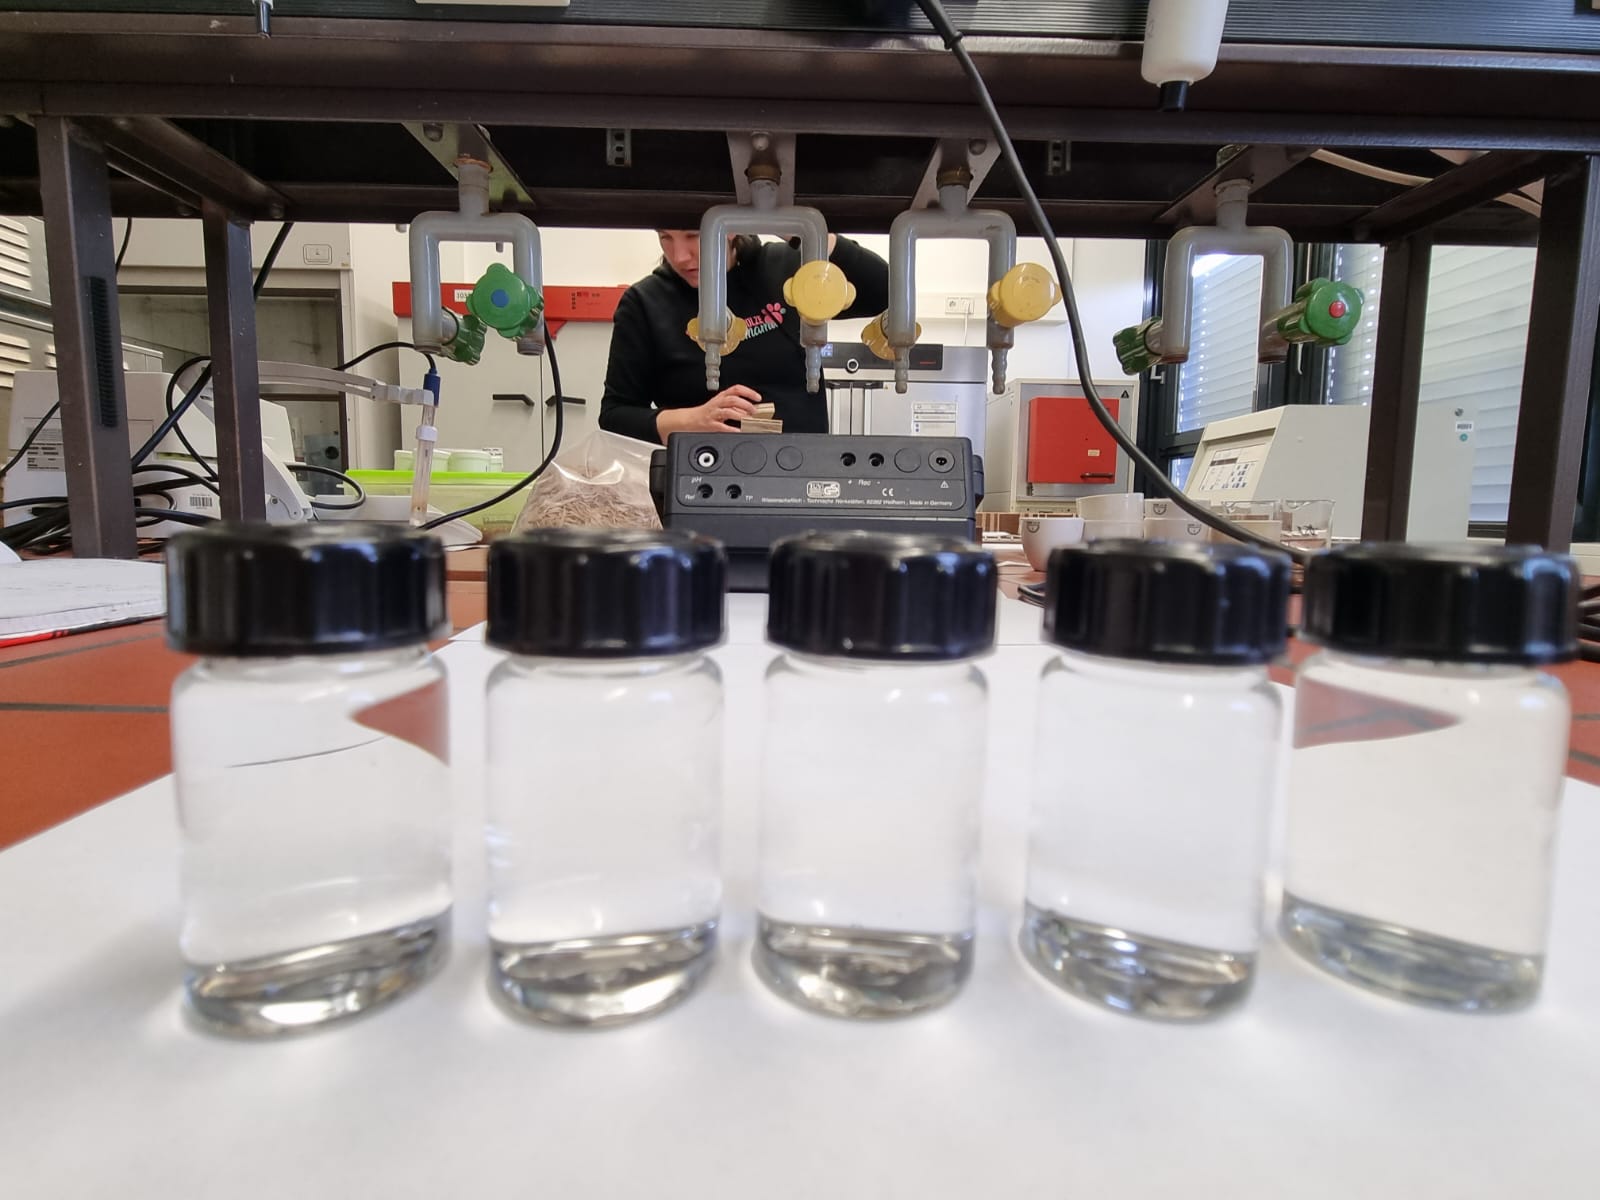

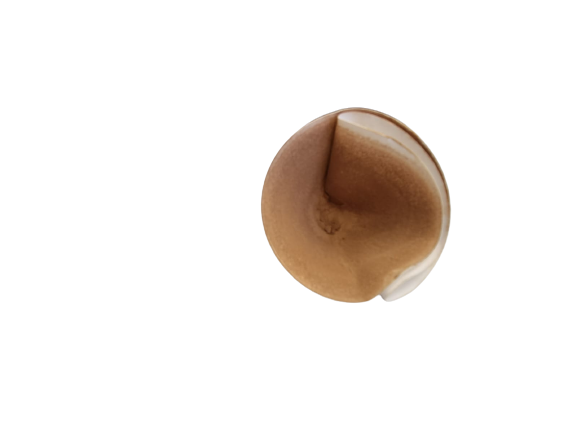


Filtrate of lignin foam from leaching test.

Leachates from the leaching test. From Left to right: **LFI, LF2, LF3, PFA and KL**

Filtrate of kraft lignin (KL) from leaching test.

Sample immersed in water and stirred with magnetic stirrer for 1 hour.
